# Supplementary material
Source: PubMed Central journal article supplement (PMC4280350)
Supplement: NIHMS623387-supplement-Supp_Material.pdf [file NIHMS623387-supplement-Supp_Material.pdf]

A

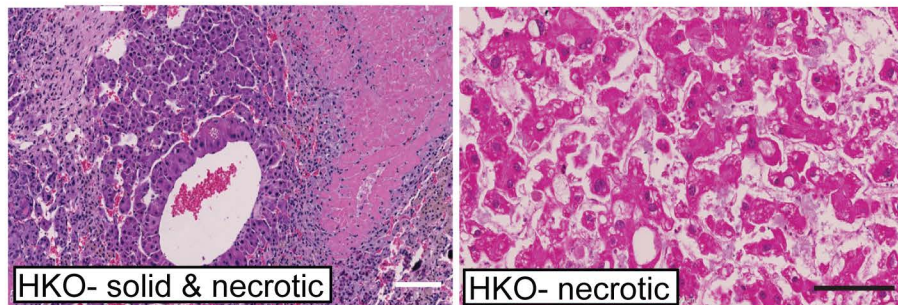

B

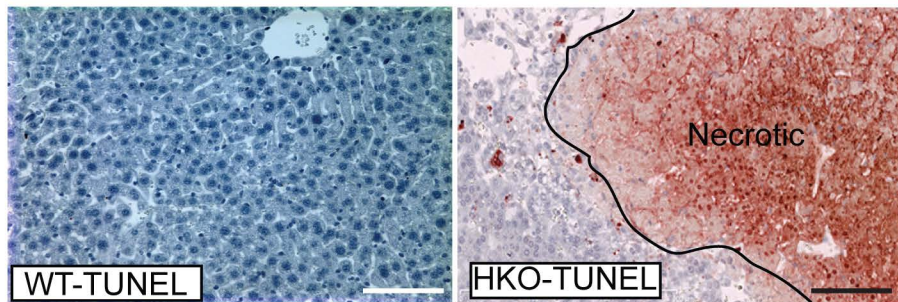

C

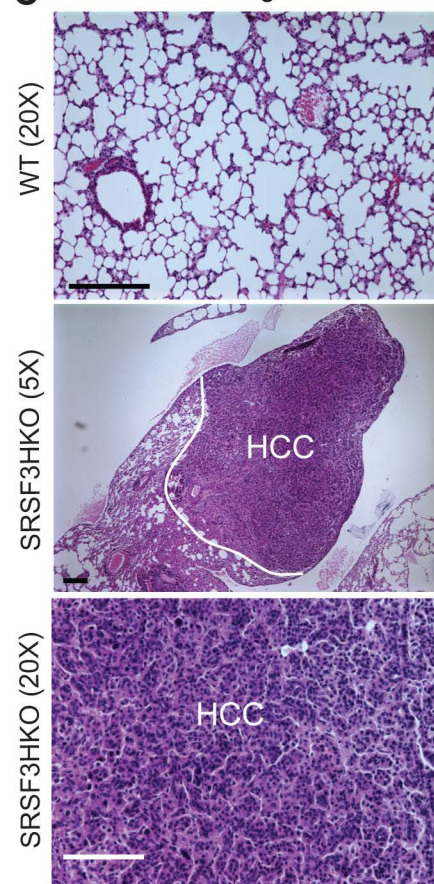

**Figure S1.** (A) Representative 20X images of liver sections from 24 month old SRSF3HKO mice stained with H&E. The SRSF3HKO section shows a dense cellular tumor with irregular nuclei and morphological pleomorphism and areas of necrosis. (B) TUNEL staining of necrotic tumor in SRSF3HKO liver. (C) Representative lung sections from WT and SRSF3HKO mice stained with H&E. Metastatic HCC in lung is marked by white line. For A, B, C, scale bar represents 100  $\mu$ m.

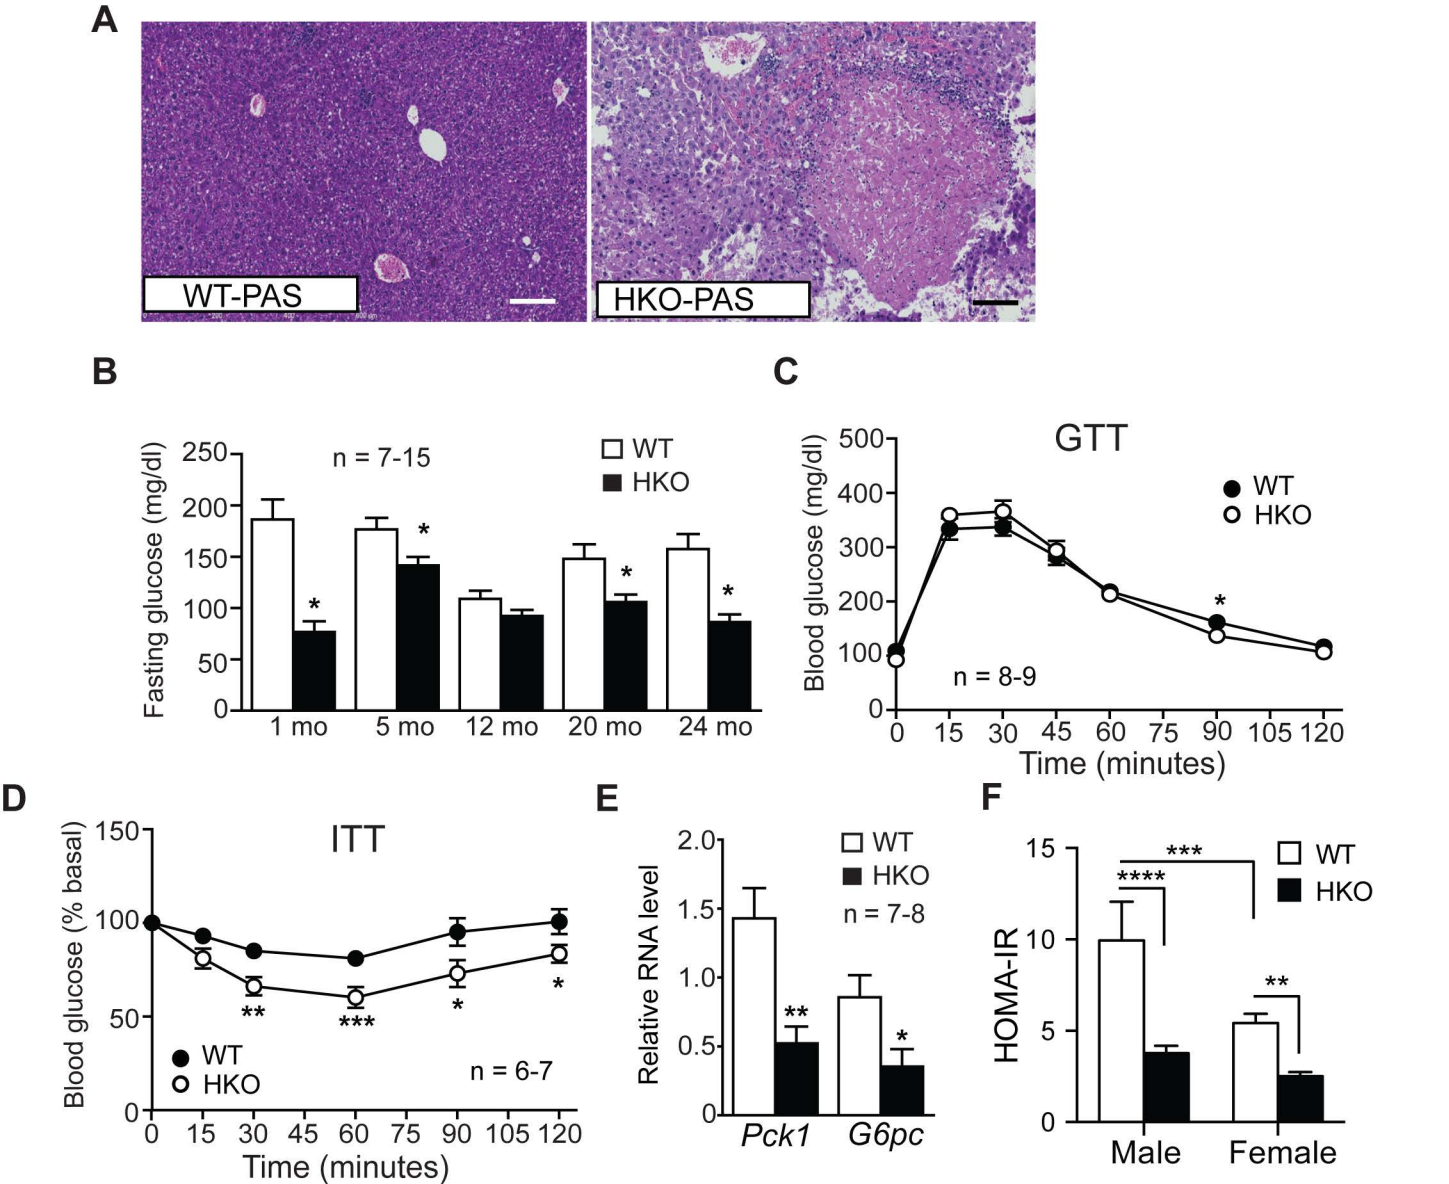

**Figure S2.** (A) Representative 10X images of liver sections from 24 month old WT and SRSF3-HKO mice stained for glycogen with PAS reagent. SRSF3-HKO livers have reduced glycogen in non-tumorous areas and glycogen is absent from tumors. Scale bar represents 100  $\mu$ m. (B) Fasting blood glucose values with aging showing that SRSF3-HKO mice are hypoglycemic compared to WT. (C) Glucose tolerance tests on 12 month old mice showing comparable glucose tolerance in WT and SRSF3-HKO mice. (D) Insulin tolerance tests on 12 month old mice showing greater insulin sensitivity in SRSF3-HKO mice. (E) QPCR on liver RNA from 12 month old mice showing significantly reduced PEPCK (*Pck1*) and glucose-6-phosphatase (*G6pc*) expression in SRSF3-HKO livers. Results are shown as mean  $\pm$  SEM. Asterisks indicate significance ( $p < 0.05$ ) vs. WT. N indicates the number of animals per group. (F) Calculated HOMA insulin resistance for WT and HKO, male and female mice. WT female mice are significantly more insulin sensitive than WT males. HKO mice are significantly more sensitive than WT for either sex. Asterisks show statistical significance (\*\* $p < 0.01$ , \*\*\* $p < 0.001$ , \*\*\*\* $p < 0.0001$ ) as indicated. HOMA-IR shows a significant sex ( $p < 0.01$ ) and genotype ( $P < 0.0001$ ) effect by 2-way ANOVA.

**A**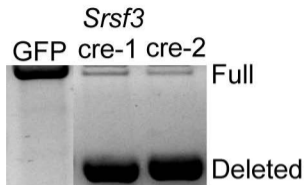**B**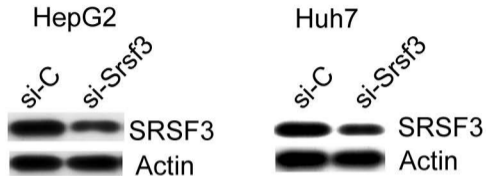

**Figure S3. A:** Acute deletion of SRSF3 by adenoviral delivery of cre. Representative gel for RT-PCR showing expression of deleted form of Srsf3 in Srsf3-floxed primary hepatocytes after adeno-cre infection. GFP-cre is used as negative control. **B:** Representative western blots showing decreased expression of SRSF3 in si-Srsf3 treated HepG2 and Huh7 cells compared to si-C control. The blots were stripped and blotted for actin as loading control.

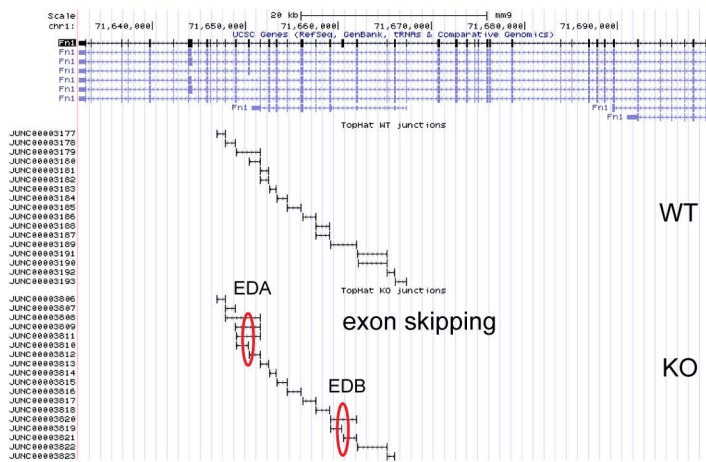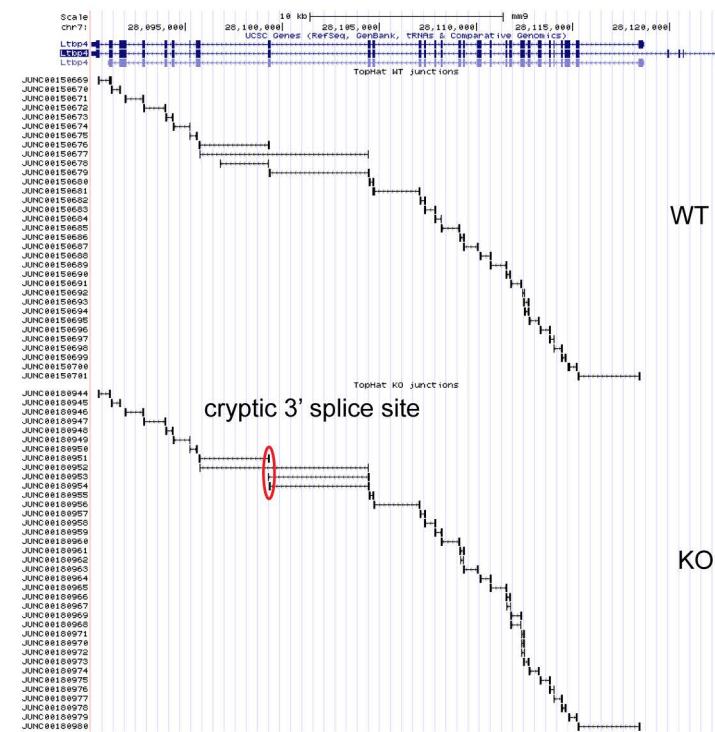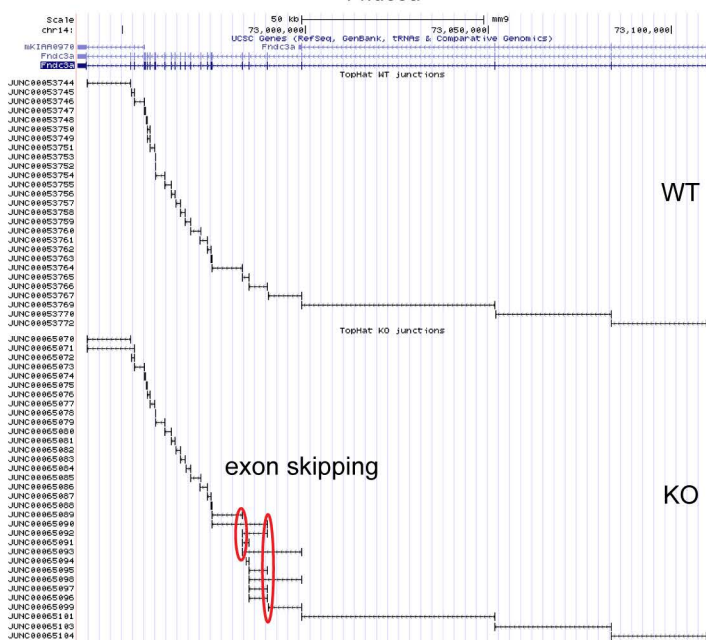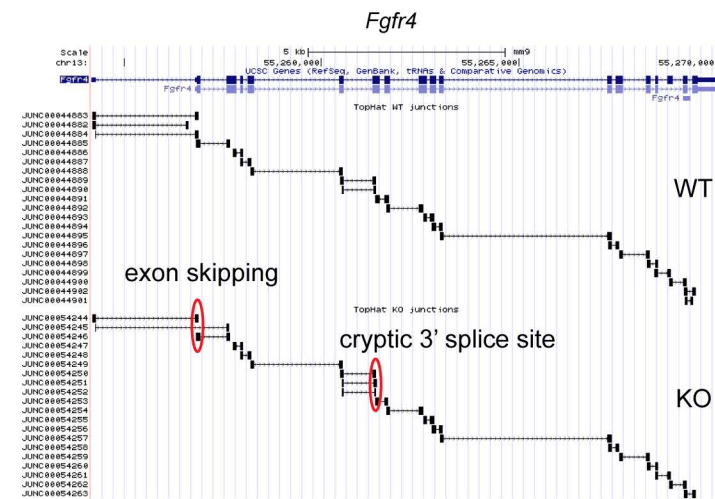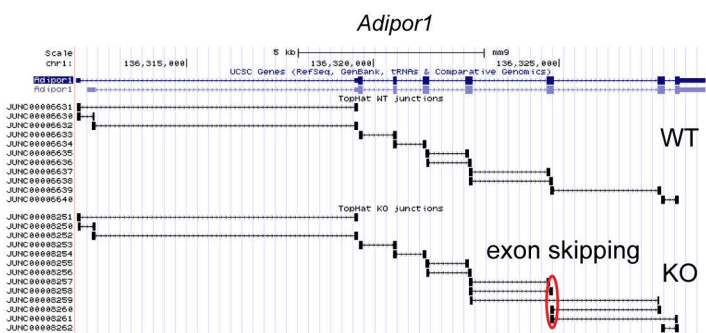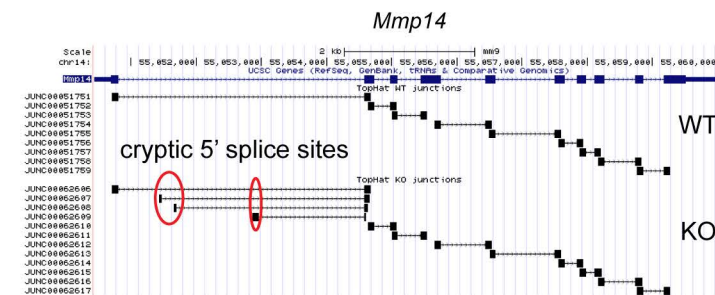

**Figure S4. Altered exon-exon junction reads from RNAseq data aligned to genome using the UCSC genome browser. Altered exon usage is indicated in red. Reads from WT mice are given above reads from SRSF3HKO mice. Reads were aligned using Tophat.**

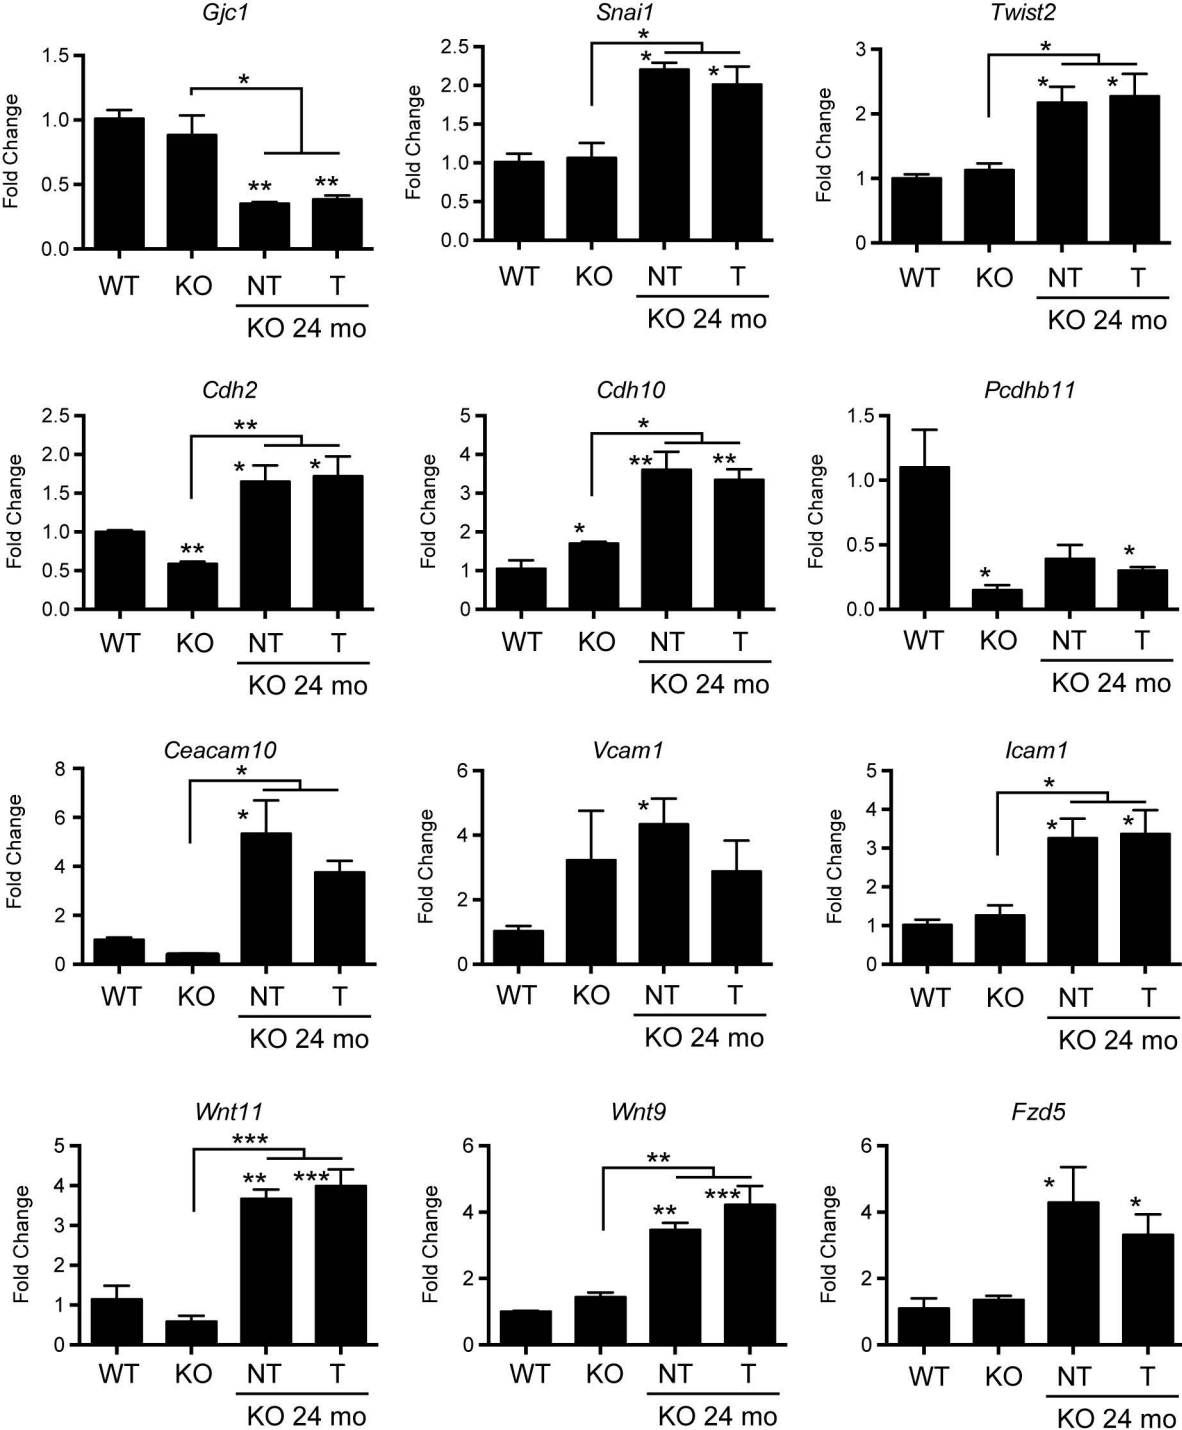

**Figure S5. Alterations in EMT and Wnt signaling genes in SRSF3HKO mice.** Gene expression was assessed in microarray data from wild-type mice (WT), SRSF3HKO mice at 1 month (KO), SRSF3HKO mice at 24 months (NT) and tumors from SRSF3HKO mice at 24 months (T). Asterisks indicate significance vs. WT or as indicated, \*, \*\*, \*\*\*  $p < 0.05$ , 0.01, or 0.001.

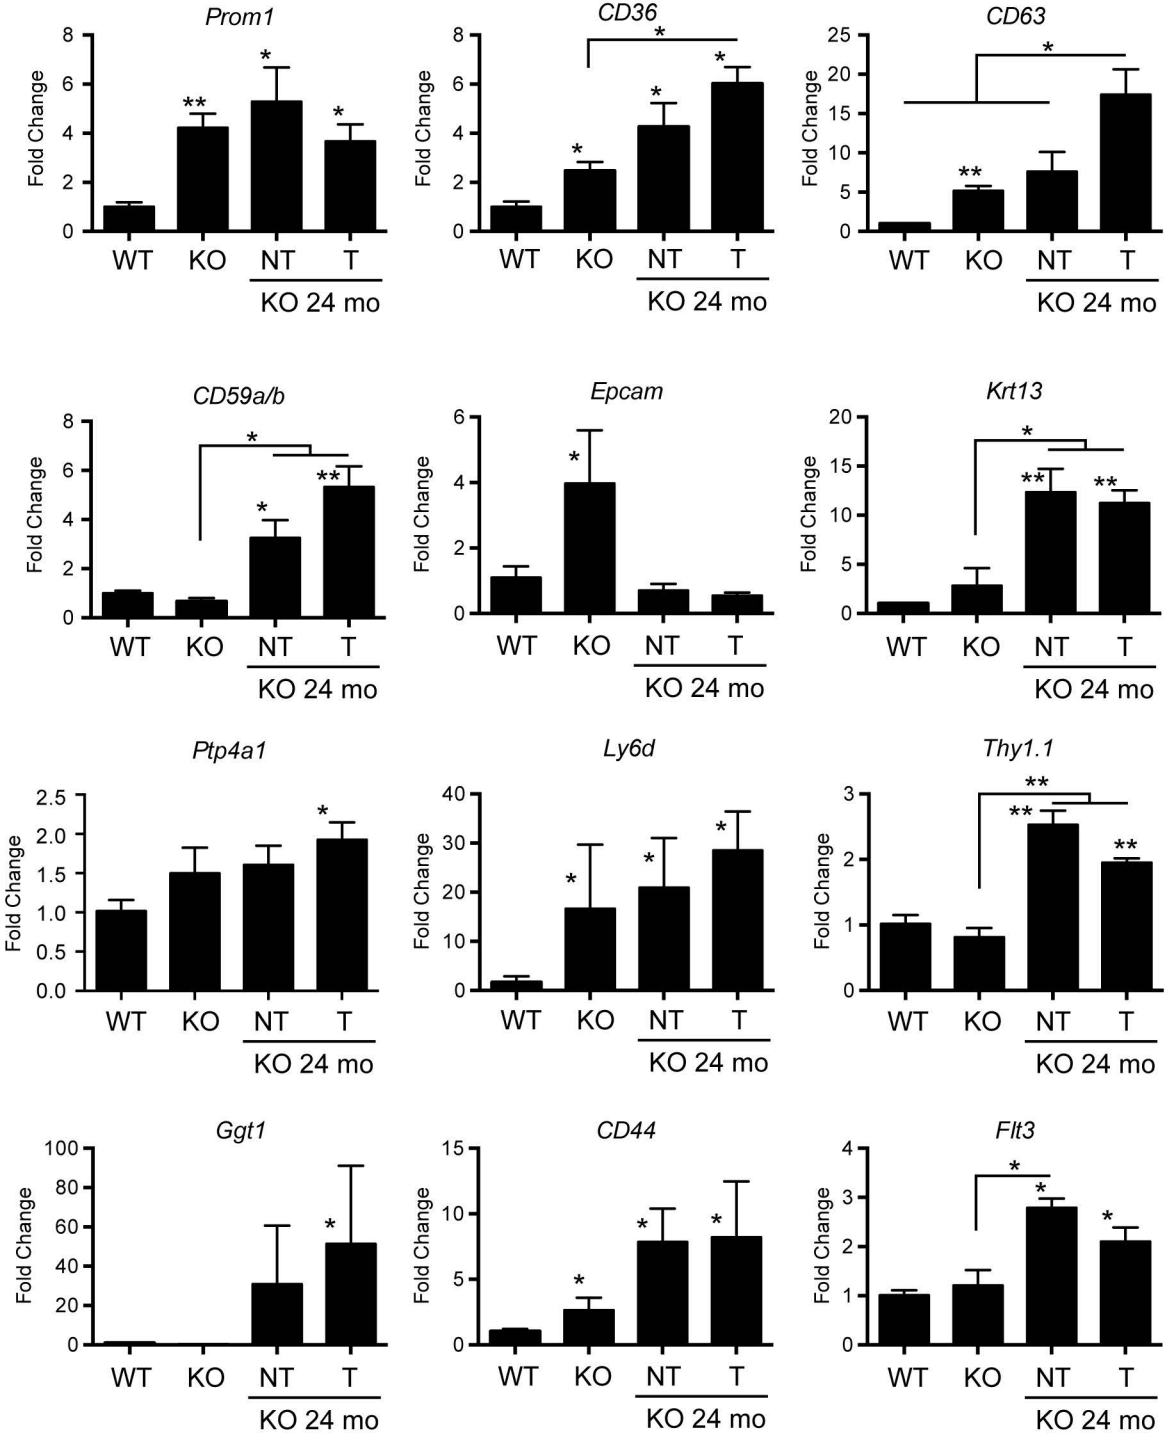

**Figure S6. Alterations in progenitor and stem cell genes in SRSF3HKO mice.** Gene expression was assessed in microarray data from wild-type mice (WT), SRSF3HKO mice at 1 month (KO), SRSF3HKO mice at 24 months (NT) and tumors from SRSF3HKO mice at 24 months (T). Asterisks indicate significance vs. WT or as indicated, \*, \*\*  $p < 0.05$ ,  $0.01$ .

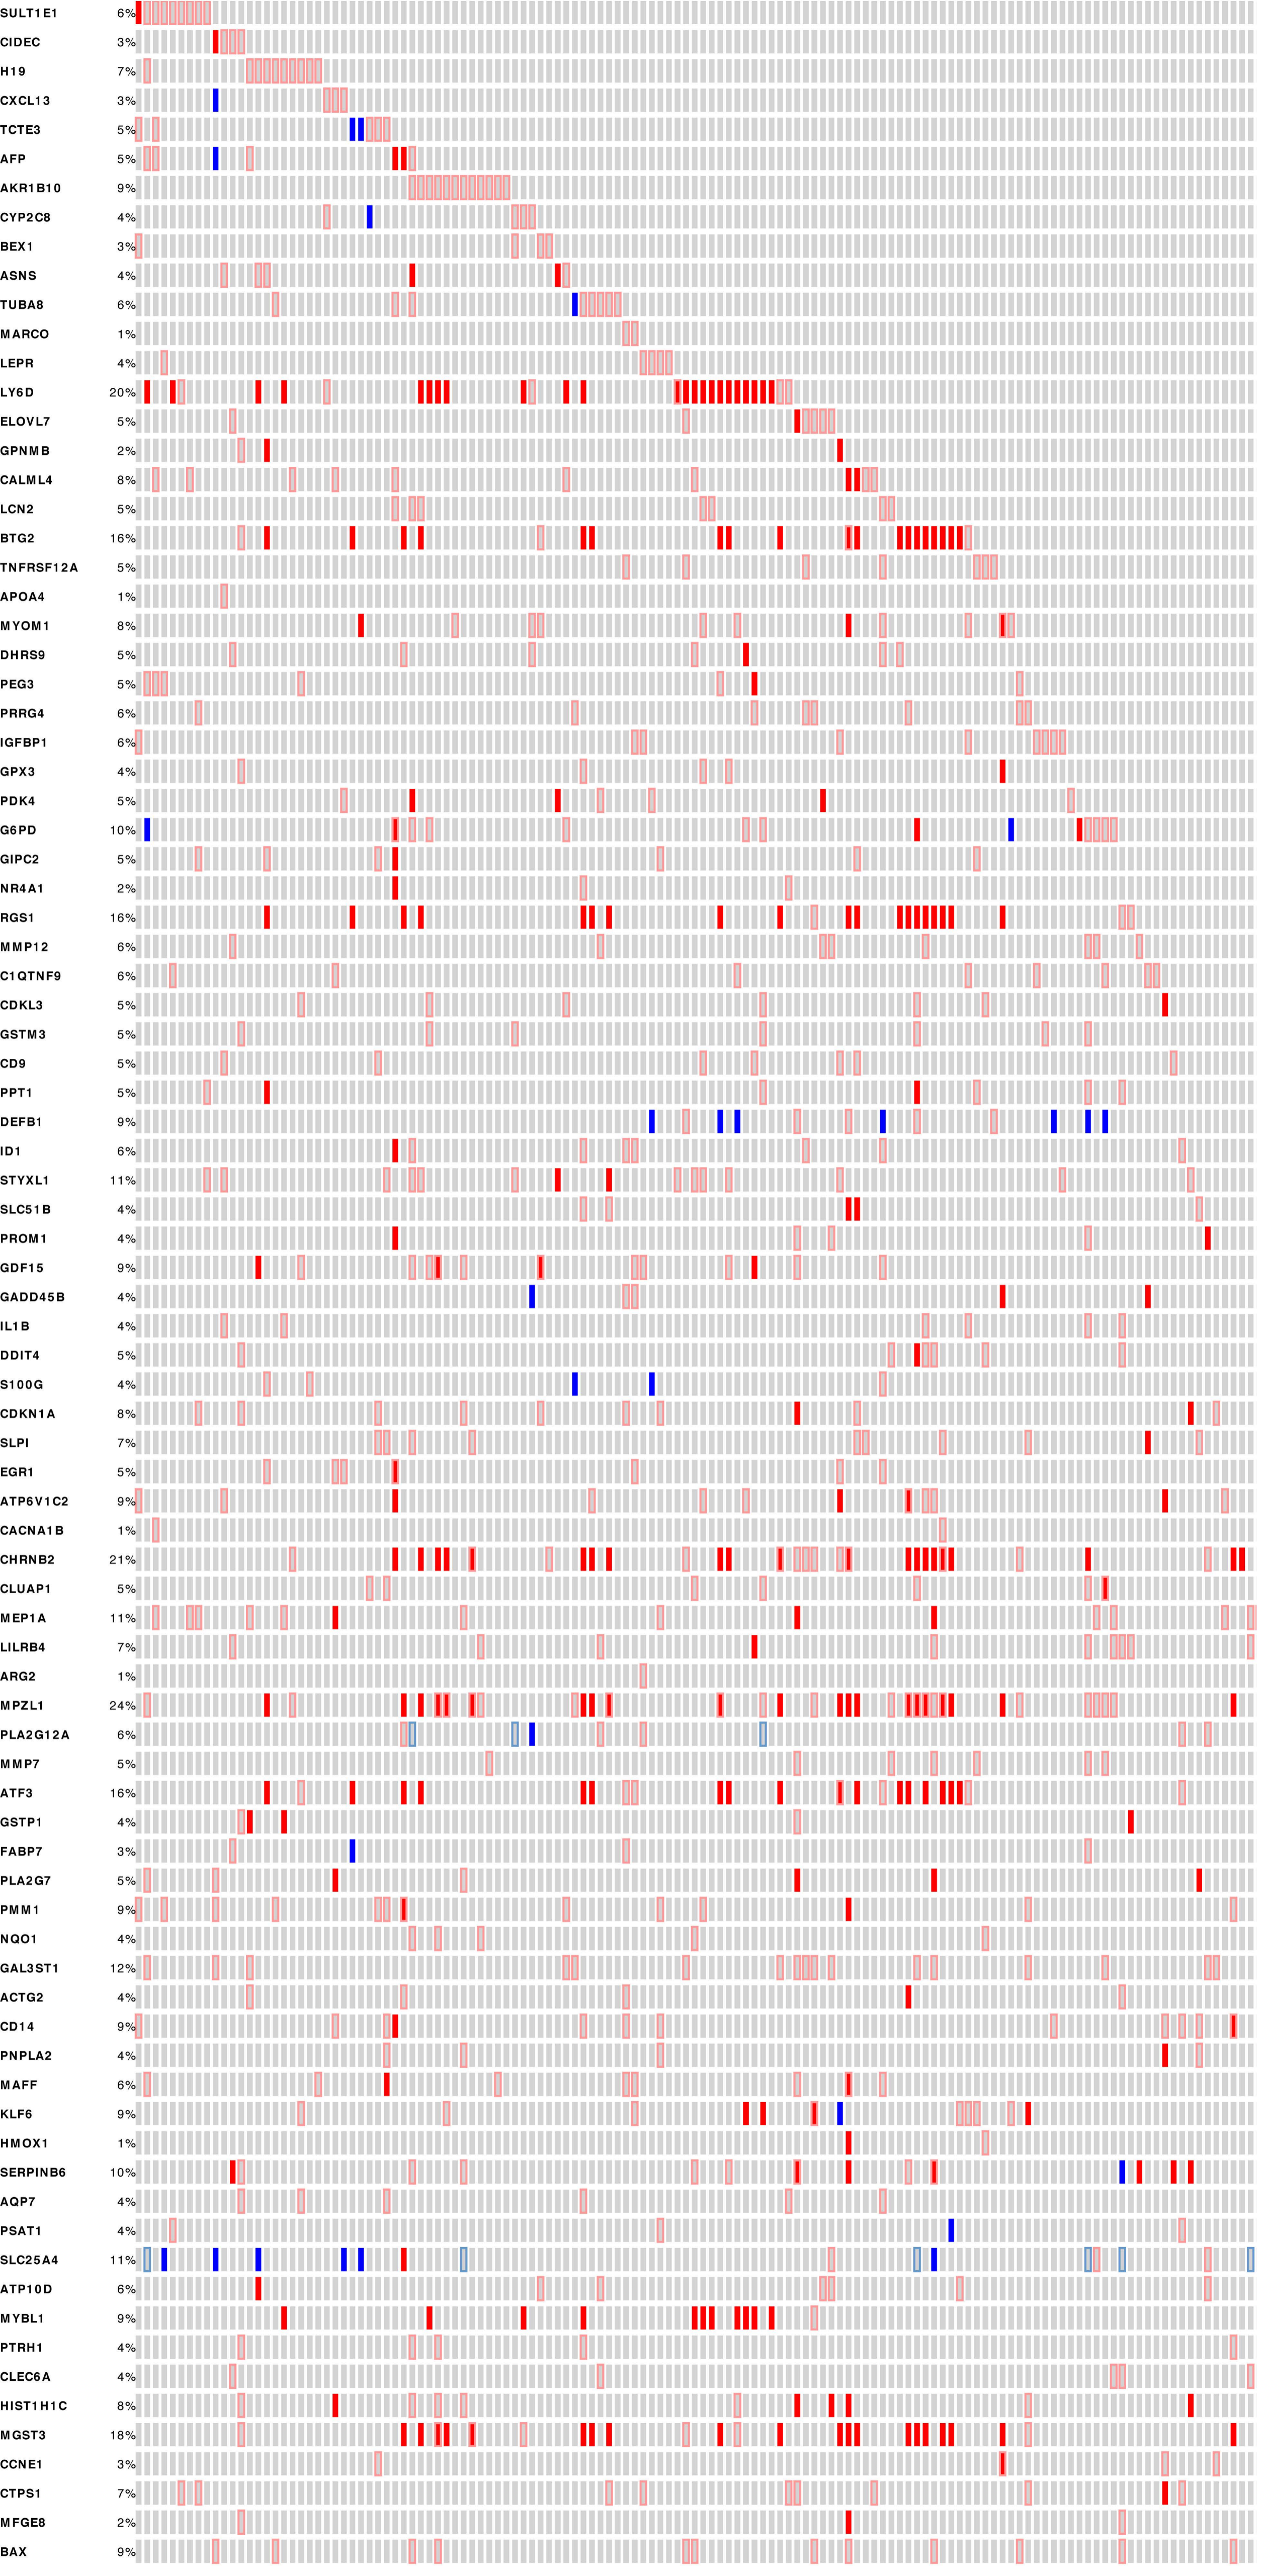

**Figure S7. Alteration of the top 100 genes from the SRSF3HKO mice in the TCGA HCC database**

Red indicates increased, blue indicates decreased, solid symbols represent amplification or deletion, hollow symbols represent expression changes.

**Table S1: Tumor incidence in 24 month old mice**

| Age (month)        | Genotype | # Mice Examined | # Mice w/ Tumor | Tumor Weight (g) | # Tumors per Mouse |
|--------------------|----------|-----------------|-----------------|------------------|--------------------|
| <b>Male Mice</b>   |          |                 |                 |                  |                    |
| 24                 | WT       | 14              | 1               | 1.2              | 1                  |
| 24                 | HKO      | 8               | 8               | 1.59-4.16        | 1-10               |
| <b>Female Mice</b> |          |                 |                 |                  |                    |
| 24                 | WT       | 22              | 0               | 0                | 0                  |
| 24                 | HKO      | 15              | 15              | 1.71-3.81        | 1-10               |

**Table S2: Changes of gene expression related to Fibrosis in SRSF3HKO mice at 1 mo**

| Locus         | Description                                                | SRSF3HKO/WT | p value  |
|---------------|------------------------------------------------------------|-------------|----------|
| <i>Mmp12</i>  | matrix metalloproteinase 12                                | 8.013       | 1.36E-11 |
| <i>Cdkl3</i>  | cyclin-dependent kinase-like 3                             | 7.207       | 2.87E-11 |
| <i>Cdkn1a</i> | cyclin-dependent kinase inhibitor 1A (P21)                 | 5.609       | 2.24E-10 |
| <i>Mmp7</i>   | matrix metalloproteinase 7                                 | 4.988       | 6.85E-10 |
| <i>Ctgf</i>   | connective tissue growth factor                            | 3.814       | 1.31E-08 |
| <i>Pdgfra</i> | platelet derived growth factor receptor, alpha polypeptide | 3.582       | 2.85E-08 |
| <i>Krt23</i>  | keratin 23                                                 | 3.425       | 5.05E-08 |
| <i>Ltbp4</i>  | latent transforming growth factor beta binding protein 4   | 0.488       | 1.62E-07 |
| <i>Mmp15</i>  | matrix metalloproteinase 15                                | 0.446       | 5.15E-09 |
| <i>Fgfr3</i>  | fibroblast growth factor receptor 3                        | 0.434       | 1.77E-09 |
| <i>Mmp19</i>  | matrix metalloproteinase 19                                | 0.403       | 8.78E-11 |
| <i>Fgfr4</i>  | fibroblast growth factor receptor 4                        | 0.332       | 2.37E-14 |
| <i>Fgf1</i>   | fibroblast growth factor 1                                 | 0.215       | 6.28E-22 |

**Table S3: Hematology Analysis from 15-18 months old WT and SRSF3HKO mice; n=3**

|                  | WT              | SRSF3HKO       |
|------------------|-----------------|----------------|
| WBC (K/ $\mu$ l) | 2.5 $\pm$ 0.47  | 1 $\pm$ 0.1**  |
| RBC (M/ $\mu$ l) | 7.2 $\pm$ 0.45  | 6.4 $\pm$ 0.19 |
| PLT (K/ $\mu$ l) | 696 $\pm$ 52    | 456 $\pm$ 13** |
| Hb (g/dL)        | 10.4 $\pm$ 0.67 | 9.9 $\pm$ 0.38 |

Values are Mean $\pm$ SE. Statistical significance was determined by Student's 2-tailed t test.



**Table S5: GSEA enrichment of human HCC genesets in SRSF3HKO and WT mouse expression profiles**

| Geneset                                          | Size | NES   | FDR q-value |
|--------------------------------------------------|------|-------|-------------|
| <b>Enriched in SRSF3HKO</b>                      |      |       |             |
| CHIANG_LIVER_CANCER_SUBCLASS_UNANNOTATED_DN      | 141  | -2.18 | 0.00        |
| BOYALT_LIVER_CANCER_SUBCLASS_G3_UP               | 139  | -2.05 | 0.00        |
| CAIRO_HEPATOBLASTOMA_CLASSES_UP                  | 406  | -1.91 | 0.00        |
| LEE_LIVER_CANCER_SURVIVAL_DN                     | 76   | -1.70 | 0.02        |
| HOSHIDA_LIVER_CANCER_SUBCLASS_S1                 | 184  | -1.55 | 0.07        |
| IIZUKA_LIVER_CANCER_PROGRESSION_G1_G2_DN         | 17   | -1.48 | 0.10        |
| BOYALT_LIVER_CANCER_SUBCLASS_G1_UP               | 82   | -1.40 | 0.15        |
| OKAMOTO_LIVER_CANCER_MULTICENTRIC_OCCURRENCE_UP  | 16   | -1.37 | 0.16        |
| HOSHIDA_LIVER_CANCER_LATE_RECURRENCE_UP          | 41   | -1.36 | 0.15        |
| YAMASHITA_LIVER_CANCER_WITH_EPCAM_UP             | 23   | -1.31 | 0.17        |
| HOSHIDA_LIVER_CANCER_SUBCLASS_S2                 | 84   | -1.31 | 0.16        |
| <b>Enriched in WT</b>                            |      |       |             |
| HSIAO_LIVER_SPECIFIC_GENES                       | 175  | 2.50  | 0.00        |
| CAIRO_LIVER_DEVELOPMENT_DN                       | 189  | 2.37  | 0.00        |
| BOYALT_LIVER_CANCER_SUBCLASS_G123_DN             | 40   | 2.30  | 0.00        |
| LEE_LIVER_CANCER_SURVIVAL_UP                     | 94   | 2.29  | 0.00        |
| BOYALT_LIVER_CANCER_SUBCLASS_G3_DN               | 36   | 2.22  | 0.00        |
| CHIANG_LIVER_CANCER_SUBCLASS_PROLIFERATION_DN    | 115  | 2.14  | 0.00        |
| CHIANG_LIVER_CANCER_SUBCLASS_POLYSOMY7_UP        | 55   | 2.12  | 0.00        |
| CAIRO_HEPATOBLASTOMA_DN                          | 198  | 2.11  | 0.00        |
| HOSHIDA_LIVER_CANCER_SUBCLASS_S3                 | 193  | 1.98  | 0.00        |
| CAIRO_HEPATOBLASTOMA_CLASSES_DN                  | 145  | 1.95  | 0.00        |
| HOSHIDA_LIVER_CANCER_SURVIVAL_DN                 | 79   | 1.82  | 0.00        |
| YAMASHITA_LIVER_CANCER_STEM_CELL_UP              | 41   | 1.78  | 0.01        |
| CHIANG_LIVER_CANCER_SUBCLASS_CTNNB1_UP           | 132  | 1.75  | 0.01        |
| ACEVEDO_LIVER_CANCER_DN                          | 384  | 1.74  | 0.01        |
| YAMASHITA_LIVER_CANCER_STEM_CELL_DN              | 49   | 1.74  | 0.01        |
| WOO_LIVER_CANCER_RECURRENCE_DN                   | 54   | 1.72  | 0.01        |
| HOSHIDA_LIVER_CANCER_LATE_RECURRENCE_DN          | 53   | 1.56  | 0.03        |
| ACEVEDO_LIVER_TUMOR_VS_NORMAL_ADJACENT_TISSUE_DN | 192  | 1.53  | 0.04        |
| CHIANG_LIVER_CANCER_SUBCLASS_CTNNB1_DN           | 127  | 1.42  | 0.07        |
| ACEVEDO_NORMAL_TISSUE_ADJACENT_TO_LIVER_TUMOR_DN | 243  | 1.35  | 0.11        |
| YE_METASTATIC_LIVER_CANCER                       | 19   | 1.31  | 0.14        |
| IIZUKA_LIVER_CANCER_PROGRESSION_G2_G3_UP         | 20   | 1.30  | 0.14        |
| CHIANG_LIVER_CANCER_SUBCLASS_INTERFERON_DN       | 38   | 1.27  | 0.16        |







|         |                    |           |       |       |       |       |         |        |         |        |        |       |       |       |                                                                                                                             |
|---------|--------------------|-----------|-------|-------|-------|-------|---------|--------|---------|--------|--------|-------|-------|-------|-----------------------------------------------------------------------------------------------------------------------------|
| 6967969 | Lrrk1              | 3.022E-03 | 0.679 | 0.057 | 0.684 | 0.057 | 135.42  | 11.15  | 91.99   | 7.69   | 7.071  | 0.124 | 6.513 | 0.125 | leucine-rich repeat kinase 1                                                                                                |
| 6815599 | Pik3r1             | 5.359E-04 | 0.673 | 0.073 | 0.679 | 0.074 | 543.94  | 51.13  | 366.24  | 39.90  | 9.075  | 0.134 | 8.498 | 0.168 | phosphatidylinositol 3-kinase, regulatory subunit, polypeptide 1 (p85 alpha)                                                |
| 6781689 | Hs3st3a1 Hs3st3b1  | 2.654E-04 | 0.668 | 0.103 | 0.671 | 0.104 | 405.90  | 29.21  | 271.01  | 41.99  | 8.657  | 0.107 | 8.046 | 0.229 | heparan sulfate (glucosamine) 3-O-sulfotransferase 3A1   heparan sulfate (glucosamine) 3-O-sulfotransferase 3B1             |
| 6989948 | Rbpms2             | 8.521E-04 | 0.667 | 0.043 | 0.671 | 0.043 | 741.66  | 56.28  | 494.59  | 31.85  | 9.527  | 0.106 | 8.944 | 0.091 | RNA binding protein with multiple splicing 2                                                                                |
| 6908528 | Palmd              | 4.024E-03 | 0.657 | 0.020 | 0.664 | 0.020 | 1146.49 | 123.43 | 752.97  | 22.96  | 10.147 | 0.149 | 9.555 | 0.044 | palmdelphin                                                                                                                 |
| 6952137 | Cadps2             | 1.893E-04 | 0.648 | 0.052 | 0.653 | 0.052 | 71.67   | 6.42   | 46.42   | 3.73   | 6.151  | 0.132 | 5.528 | 0.114 | Ca2+-dependent activator protein for secretion 2                                                                            |
| 6803284 | Serpina3c Serpina3 | 5.479E-04 | 0.636 | 0.073 | 0.640 | 0.073 | 236.85  | 20.22  | 150.59  | 17.28  | 7.877  | 0.122 | 7.216 | 0.163 | serine (or cysteine) peptidase inhibitor, clade A, member 3C   serine (or cysteine) peptidase inhibitor, clade A, member 3K |
| 6899016 | Arhgef11 4933430   | 5.968E-03 | 0.636 | 0.075 | 0.637 | 0.075 | 253.83  | 11.59  | 161.32  | 18.95  | 7.985  | 0.065 | 7.313 | 0.174 | Rho guanine nucleotide exchange factor (GEF) 11   RIKEN cDNA 4933430H15 gene                                                |
| 6906749 | Sema4a             | 5.809E-03 | 0.632 | 0.077 | 0.640 | 0.078 | 921.51  | 102.33 | 582.79  | 71.12  | 9.830  | 0.161 | 9.167 | 0.168 | sema domain, immunoglobulin domain (Ig), transmembrane domain (TM) and short cytoplasmic domain, (semaphorin) 4A            |
| 6904979 | Setd7              | 3.405E-03 | 0.619 | 0.057 | 0.625 | 0.057 | 128.50  | 11.99  | 79.58   | 7.30   | 6.993  | 0.135 | 6.302 | 0.135 | SET domain containing (lysine methyltransferase) 7                                                                          |
| 6909278 | Enpep              | 5.188E-03 | 0.605 | 0.063 | 0.608 | 0.063 | 603.82  | 41.02  | 365.34  | 38.00  | 9.231  | 0.102 | 8.498 | 0.144 | glutamyl aminopeptidase                                                                                                     |
| 6945032 | Smo                | 6.091E-04 | 0.597 | 0.040 | 0.604 | 0.041 | 270.24  | 27.64  | 161.32  | 10.84  | 8.062  | 0.154 | 7.327 | 0.100 | smoothed homolog (Drosophila)                                                                                               |
| 6820113 | Gfra2              | 3.893E-03 | 0.593 | 0.078 | 0.594 | 0.078 | 122.75  | 4.45   | 72.76   | 9.62   | 6.938  | 0.052 | 6.160 | 0.191 | glial cell line derived neurotrophic factor family receptor alpha 2                                                         |
| 6778358 | Sec14a             | 1.087E-04 | 0.582 | 0.023 | 0.583 | 0.023 | 1751.94 | 74.36  | 1019.95 | 40.78  | 10.772 | 0.063 | 9.992 | 0.058 | SEC14-like 4 (S. cerevisiae)                                                                                                |
| 6846197 | Bbx A730021G18RI   | 2.411E-03 | 0.579 | 0.037 | 0.581 | 0.037 | 133.90  | 8.31   | 77.52   | 4.98   | 7.060  | 0.088 | 6.271 | 0.091 | bobby sox homolog (Drosophila)   RIKEN cDNA A730021G18 gene   RIKEN cDNA A930011E06 gene                                    |
| 6749933 | Adam23             | 2.116E-03 | 0.560 | 0.107 | 0.562 | 0.107 | 186.41  | 12.13  | 104.40  | 19.90  | 7.536  | 0.092 | 6.646 | 0.304 | a disintegrin and metallopeptidase domain 23                                                                                |
| 6873133 | Pik3ap1            | 3.010E-05 | 0.553 | 0.050 | 0.560 | 0.050 | 1446.64 | 152.58 | 800.10  | 71.75  | 10.481 | 0.162 | 9.633 | 0.126 | phosphoinositide-3-kinase adaptor protein 1                                                                                 |
| 6949593 | Slc6a12            | 2.004E-03 | 0.551 | 0.027 | 0.563 | 0.027 | 1271.79 | 192.93 | 701.01  | 33.92  | 10.282 | 0.208 | 9.450 | 0.072 | solute carrier family 6 (neurotransmitter transporter, betaine/GABA), member 12                                             |
| 7016584 | Dcaf12l1           | 1.218E-03 | 0.528 | 0.042 | 0.529 | 0.042 | 105.47  | 5.84   | 55.64   | 4.41   | 6.716  | 0.082 | 5.789 | 0.110 | DDB1 and CUL4 associated factor 12-like 1                                                                                   |
| 6959254 | Cyp2b13 Rnf170 C   | 5.10E-05  | 0.500 | 0.258 | 0.511 | 0.264 | 1087.66 | 151.87 | 543.41  | 280.38 | 10.055 | 0.220 | 8.728 | 0.691 | cytochrome P450, family 2, subfamily b, polypeptide 13   polypeptide 9   ring finger protein 170   Dmx-like 1               |
| 6869545 | Pde6c              | 4.61E-05  | 0.494 | 0.010 | 0.578 | 0.011 | 78.09   | 32.13  | 38.59   | 0.74   | 6.060  | 0.556 | 5.270 | 0.028 | phosphodiesterase 6C, cGMP specific, cone, alpha prime                                                                      |
| 6943822 | Casd1              | 7.208E-04 | 0.489 | 0.131 | 0.494 | 0.132 | 170.52  | 17.29  | 83.38   | 22.29  | 7.398  | 0.154 | 6.271 | 0.407 | CAS1 domain containing 1                                                                                                    |
| 6874610 | Bend7 Prc1         | 7.142E-04 | 0.435 | 0.059 | 0.438 | 0.059 | 183.28  | 17.22  | 79.69   | 10.74  | 7.506  | 0.130 | 6.288 | 0.206 | BEN domain containing 7   protein regulator of cytokinesis 1                                                                |
| 6895460 | Zfhx4              | 7.278E-03 | 0.435 | 0.046 | 0.455 | 0.048 | 114.07  | 25.31  | 49.57   | 5.26   | 6.767  | 0.304 | 5.616 | 0.147 | zinc finger homeodomain 4                                                                                                   |
| 6900071 | Ngf                | 8.58E-05  | 0.277 | 0.089 | 0.498 | 0.160 | 472.75  | 347.05 | 130.93  | 41.98  | 8.039  | 1.080 | 6.890 | 0.448 | nerve growth factor                                                                                                         |
| 6932190 | Csn3               | 4.37E-05  | 0.273 | 0.116 | 0.571 | 0.242 | 178.26  | 140.42 | 48.64   | 20.62  | 6.413  | 1.234 | 5.369 | 0.561 | casein kappa                                                                                                                |
| 6778972 | Egfr               | 9.10E-05  | 0.272 | 0.039 | 0.316 | 0.045 | 1270.58 | 486.28 | 346.00  | 49.65  | 10.094 | 0.562 | 8.407 | 0.198 | epidermal growth factor receptor                                                                                            |
| 6915847 | Lepr               | 1.63E-05  | 0.177 | 0.007 | 0.316 | 0.013 | 485.46  | 345.43 | 85.84   | 3.55   | 8.087  | 1.106 | 6.421 | 0.060 | leptin receptor                                                                                                             |
| 6989195 | Gldn               | 9.62E-06  | 0.156 | 0.022 | 0.242 | 0.034 | 323.04  | 212.68 | 50.30   | 7.06   | 7.698  | 0.932 | 5.623 | 0.209 | gliomedin                                                                                                                   |
| 6938093 | Ppargc1a           | 1.29E-05  | 0.131 | 0.043 | 0.182 | 0.059 | 639.76  | 367.73 | 84.11   | 27.25  | 8.849  | 0.807 | 6.226 | 0.505 | peroxisome proliferative activated receptor, gamma, coactivator 1 alpha                                                     |
| 6832572 | Miox               | 1.12E-06  | 0.124 | 0.004 | 0.325 | 0.010 | 340.77  | 291.65 | 42.40   | 1.35   | 7.027  | 1.414 | 5.405 | 0.046 | myo-inositol oxygenase                                                                                                      |
| 6964531 | Dmbt1              | 7.43E-07  | 0.101 | 0.003 | 0.179 | 0.006 | 462.16  | 288.94 | 46.70   | 1.47   | 8.031  | 1.208 | 5.544 | 0.045 | deleted in malignant brain tumors 1                                                                                         |
| 7016826 | Gpc3               | 7.66E-07  | 0.085 | 0.002 | 0.180 | 0.005 | 602.14  | 460.57 | 51.35   | 1.40   | 8.160  | 1.289 | 5.681 | 0.039 | glypican 3                                                                                                                  |
| 6810697 | Akr1c18            | 4.14E-07  | 0.042 | 0.005 | 0.110 | 0.013 | 754.10  | 518.98 | 32.02   | 3.84   | 8.188  | 1.733 | 4.981 | 0.167 | aldo-keto reductase family 1, member C18                                                                                    |

## **Supporting Materials and Methods**

### **Blood Chemistry Analysis**

Hematology analysis was performed using un-clotted blood from SRSF3HKO and WT mice. Fasting blood glucose concentrations were measured using ACCU-Check glucometer (Roche). Serum triglycerides were measured using Triglyceride ELISA Kit (LabAssay from Wako Chemicals USA) following the manufacturers' instructions.

### **Glucose Tolerance Test (GTT) and Insulin Tolerance Test (ITT)**

To assess glucose tolerance, WT and HKO mice were fasted for 6 h. Blood glucose concentrations were measured by tail bleeding using an ACCU-Check glucometer, at time 0 and indicated times thereafter, for a total of 2 h, after an ip injection of glucose of 1 gm/kg body weight. For ITTs, mice were fasted for 4 hours and insulin used for ip injection was 0.5U/ kg body weight.

### **Isolation of Primary Murine Hepatocytes:**

Primary hepatocytes from WT and SRSF3HKO liver were obtained by two-step perfusion with liver perfusion medium (Gibco BRL 17701-038; Gibco, Detroit, MI) followed by digestion medium, L15 (Sigma L5520; Sigma, St. Louis, MO) containing 0.15 g/ml collagenase and 10 µg/ml DNase I. Liver cells were disaggregated by passing through a 40-µm-pore nylon mesh Cell Strainer (BD Falcon). The numbers of total viable cells were determined by Trypan blue staining.

### **Confirmation of Altered Splicing and Gene Expression.**

Total RNA was reverse transcribed using random hexamers with MultiScribe MuLV reverse transcriptase (Applied Biosystems) then subjected to PCR using GoTaq polymerase (Promega). For confirmation of exon skipping, RT-PCR was done on each sample using primers on constitutive exons flanking the altered exon. To ensure a linear PCR amplification allowing semi-quantitative assessment of the spliced products, we performed PCR analysis with 25 cycles. Representative results from each group (WT and HKO) are shown in the figures. PCR products were separated on 3% agarose or 12% non-denaturing polyacrylamide gels, stained with

ethidium bromide, visualized and quantified with Kodak Electrophoresis Documentation and Analysis System (EDAS) 290.

For mRNA expression studies, real-time quantitative RT-PCR assays were performed for each sample in triplicate in a final reaction volume of 20  $\mu$ l. The endogenous housekeeping gene *Gapdh* or the gene of interest was amplified using 20 ng of cDNA with iTaq SYBR Green supermix with ROX (Bio-Rad Laboratories) on Chromo4 Thermal Cyclers (Bio-Rad). The data were analyzed using the DDCt method and presented as the relative change in gene expression, normalized to *Gapdh*. All primers for qPCR were designed with Universal Probe Library (Roche).

### **Growth hormone treatment.**

1-month-old mice were starved overnight and injected intraperitoneally with 5 mg of GH/kg BW in normal saline (0.9% NaCl) in a final volume of 0.2 ml. Animals injected with saline were used to evaluate basal conditions. The animals were sacrificed 7.5 min after injection, the livers were removed and snap frozen for protein isolation.

### **Analysis of Microarray data**

Expression data from exon array were analyzed by two methods: 1) data were normalized by RMA and analyzed by ANOVA using Genespring (Agilent Technologies, Santa Clara, CA); 2) data were normalized by RMA and analyzed by ANOVA using Non-Coder (<http://noncoder.mpi-bn.mpg.de/#>); and 3) unnormalized raw data was analyzed using a Bayesian variance modeling approach in VAMPIRE. In all cases multiple testing correct was applied using a FDR q-value < 0.05. Lists of significant genes by the different approaches were imported into GeneSpring for visualization and compilation. Enrichment analyses were performed on the list of altered genes using GeneGo's Metacore software (St. Joseph, MI), and on the raw data using Gene Set Enrichment Analysis (GSEA, Broad Institute, Cambridge, MA).

### **IGF2 and insulin treatment:**

IGF2 and insulin treatment were performed using primary hepatocytes from SRSF3HKO and age matched WT mice. After plating and attachment, primary hepatocytes were serum starved for 5 hrs and then treated with IGF2 (50 or 100 ng/ml) or insulin (30 or 100 nM) for 5 minutes.

## **Immunoblotting and Immunohistochemistry**

For immunoblotting, livers or primary hepatocytes were lysed in extraction buffer (20mM Tris, pH 7.9; 300 mM NaCl; 1% Nonidet P-40) supplemented with protease and phosphatase inhibitors. Liver/hepatocyte lysates were separated by SDS-PAGE, transferred to PVDF membranes and immunoblotted with primary antibodies followed by HRP-conjugated secondary antibodies and developed using an ECL+ kit (GE).

Antibodies used for immunoblotting : anti-phospho STAT5 (M-186) rabbit polyclonal antibody (1:1000 dilutions, Cell Signaling Technologies), anti-insulin/insulin-like growth factor -1 receptor dual phosphospecific (pYpY1162/1163) rabbit polyclonal (Biosource International, Camarilo, CA, USA), anti-Insulin receptor beta rabbit polyclonal (BD Transduction Laboratories), non-phospho (active) beta catenin (Ser33/37/Thr41)(D13A1) rabbit monoclonal antibody (Cell Signaling Technologies), phosphor-Gsk-3 Beta rabbit polyclonal antibody (Cell Signaling Technologies), anti-cyclin D1 rabbit polyclonal antibody (abcam), anti- c-Myc rabbit polyclonal antibody (Cell Signaling Technologies), anti-total/phospho-AKT (Cell Signaling Technologies), anti-total/phospho ERK1/2 rabbit polyclonal antibody (Cell Signaling Technologies), anti-STAT5 rabbit polyclonal antibody (Cell Signaling Technologies), anti-phospho-NFkB-65 rabbit polyclonal antibody (Cell Signaling Technologies), anti-phospho-JNK/SAPK rabbit polyclonal antibody (Cell Signaling Technologies).

Immunohistochemistry was performed on formalin-fixed, paraffin-embedded mouse liver sections using the following antibodies: anti-F/480 (MCA497B, AbD Serotec, UK), anti-IGF2 (abcam, ab63984), anti-SRSF3 (abcam, ab125124), anti-Laminin (abcam, ab80580). Alpha-smooth muscle actin staining was performed using Actin,  $\alpha$ -Smooth Muscle, Immunohistology Kit (Sigma). TUNEL staining was carried out using ApopTag Peroxidase In Situ Apoptosis Detection Kit (Millipore). H&E-stained sections were analyzed for inflammation according to the following scoring system: 0, no inflammation; 1, mild lymphocytic infiltration in the portal triad; 2, severe lymphocytic infiltration in portal triad; 3, extended infiltration of lymphocytes throughout liver. Sections were scored for steatosis according to the following scale: 0, no steatosis; 1, microsteatosis; 2, microsteatosis and mild macrosteatosis; 3, severe macrosteatosis. Sirius red stained sections were analyzed for fibrosis as follows: 0, no fibrosis; 1, mild fibrosis in the portal triad; 2, severe fibrosis in portal triad; 3: bridging fibrosis.



For the human liver cancer tissue array (LV1503, US Biomax) and the pathological samples of HCC and normal liver, immunohistochemistry was performed using anti-SRSF3 rabbit polyclonal antibody (abcam, ab125124) with Super PicTure Polymer Detection Kit (Invitrogen Corporation, Frederick, MD).
